# Supplementary material
Source: PubMed Central journal article supplement (PMC3375061)

## **Supplementary Material**

### **The Alpha1 Isoform of Soluble Guanylate Cyclase Regulates Cardiac Contractility but is not Required for Ischemic Preconditioning**

#### **Basic Research in Cardiology**

Patrick Y. Sips<sup>1</sup>, Peter Brouckaert<sup>2</sup>, and Fumito Ichinose<sup>1</sup>

<sup>1</sup> Department of Anesthesia, Critical Care, and Pain Medicine, Massachusetts General Hospital, 149, 13<sup>th</sup> Street, Charlestown, MA 02129, USA

<sup>2</sup> Department of Medical Molecular Biology, Ghent University, and Department for Molecular Biomedical Research, Flanders Institute for Biotechnology, Technologiepark 927, B-9052 Ghent, Belgium

#### **Corresponding Author:**

Patrick Sips

E-mail: [psips@partners.org](mailto:psips@partners.org)

|                                      | <b>WT</b>      |                | <b>sGC<math>\alpha</math>1KO</b> |                | <b>P</b> |
|--------------------------------------|----------------|----------------|----------------------------------|----------------|----------|
|                                      | <b>Control</b> | <b>IPC</b>     | <b>Control</b>                   | <b>IPC</b>     |          |
| <b>N</b>                             | 18             | 19             | 12                               | 13             |          |
| <b>Flow Rate</b><br>ml/min           | 1.4 $\pm$ 0.7  | 1.4 $\pm$ 0.6  | 1.4 $\pm$ 0.3                    | 1.6 $\pm$ 0.3  | 0.3673   |
| <b>LVDevP</b><br>mmHg                | 16 $\pm$ 16    | 24 $\pm$ 19    | 20 $\pm$ 16                      | 33 $\pm$ 24    | 0.0385   |
| <b>dP/dt<sub>max</sub></b><br>mmHg/s | 549 $\pm$ 545  | 855 $\pm$ 743  | 602 $\pm$ 563                    | 1150 $\pm$ 858 | 0.0195   |
| <b>dP/dt<sub>min</sub></b><br>mmHg/s | -388 $\pm$ 415 | -583 $\pm$ 498 | -481 $\pm$ 464                   | -863 $\pm$ 698 | 0.0359   |

**Supplementary Table 1: Functional parameters in WT and sGC $\alpha$ 1KO hearts after 20 min of reperfusion**

Hearts were paced at 7 Hz during the measurements. N: number of mice per group; LVDevP: left ventricular (LV) developed pressure; dP/dt<sub>max</sub>: maximum rate of developed LV pressure; dP/dt<sub>min</sub>: minimum rate of developed LV pressure; P: P-value for the effect of IPC vs control in all groups after two-way ANOVA analysis. No significant differences were found after two-way ANOVA with Bonferroni post-hoc tests to compare between control and IPC values for each genotype

## Supplementary Discussion

We observed a significant effect for the treatment factor (IPC versus control ischemia-reperfusion) in all groups when using two-way ANOVA to analyze LVDevP,  $dP/dt_{\max}$ , and  $dP/dt_{\min}$  (supplemental table 1), indicating that IPC increased post-ischemic cardiac function. However, we did not detect a statistically significant IPC-induced improvement in functional recovery in WT or  $sGC\alpha 1KO$  hearts using Bonferroni post-tests. This was due to the large variation that we observed in cardiac function during the reperfusion phase. Nevertheless, the reduction in infarct size that we observed was very robust, showing a highly significant decrease of 35 - 40% after IPC versus control ischemia-reperfusion in both genotypes (Figure 3). This decrease in infarct size is considered the most important endpoint for measuring the effects of IPC, having more relevance than the degree of post-ischemic functional recovery to gauge the efficacy of cardioprotection by IPC [2, 4]. Indeed, the extent of immediate postischemic contractile recovery is largely a measure of the severity of myocardial stunning, an independent transient phenomenon that is caused by free radical damage [1], and which is not affected by IPC [3].

## **Supplementary Method**

### *cGMP measurements*

Cardiac effluents were collected during Langendorff perfusion of hearts before and after administration of 1  $\mu\text{mol/L}$  DEA/NO, and immediately frozen in liquid nitrogen. Prior to the cGMP determination, samples were purified by ice-cold ethanol precipitation to remove proteins. Subsequently, the samples were dried by vacuum centrifugation and resuspended in assay buffer. cGMP concentrations in the samples were then determined using an enzyme immunoassay (Biomedical Technologies, Stoughton, MA) according to the manufacturer's recommendations. cGMP concentrations in the samples were then multiplied by the flow rate in the Langendorff system at the time of collection to obtain the amount of cGMP produced per minute.

## Supplementary Legend

**Supplementary Fig. 1** cGMP release in the cardiac effluent of isolated hearts before and after treatment with DEA/NO (1  $\mu\text{mol/l}$ ). N=4-9 per group; \*\*\*:  $P < 0.001$  vs baseline sample by Bonferroni's post hoc test after repeated measures two-way ANOVA

### **Supplementary References**

1. Bolli R, Marban E (1999) Molecular and Cellular Mechanisms of Myocardial Stunning. *Physiol. Rev.* 79:609-634
2. Cohen MV (2004) Efficacy of preconditioning should be gauged by reduction of infarction. *Br J Pharmacol* 141:197-198
3. Gelpi RJ, Morales C, Cohen MV, Downey JM (2002) Xanthine oxidase contributes to preconditioning's preservation of left ventricular developed pressure in isolated rat heart: developed pressure may not be an appropriate end-point for studies of preconditioning. *Basic Res Cardiol* 97:40-46
4. Lochner A, Genade S, Moolman JA (2003) Ischemic preconditioning: Infarct size is a more reliable endpoint than functional recovery. *Basic Res Cardiol* 98:337-346

### Supplementary Figure 1

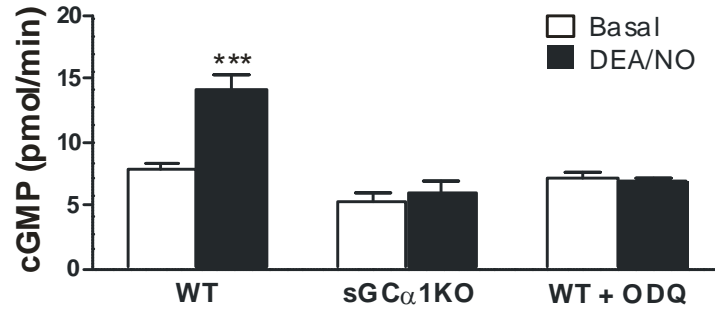

Supplement: NIHMS380820-supplement-1.pdf [file NIHMS380820-supplement-1.pdf]
